# Supplementary material for: Distinct metabolomic signatures in allergic rhinitis with concurrent chronic spontaneous urticaria: an untargeted metabolomics analysis reveals novel biomarkers and pathway alterations
Source: Front Immunol. 2025 Jun 10;16:1555664. doi: 10.3389/fimmu.2025.1555664 (PMC12185459; doi:10.3389/fimmu.2025.1555664)
Supplement: Supplementary file 2 [file SupplementaryFile2.xlsx]

## Sheet: Sheet1
Index	Compounds	VIP	P-value	FDR	Fold_Change	Log2FC	Type
MW0053905	Nbd-ceramide	1.48235	0.0309382	0.663097	1.15829	0.212001	up
MW0106072	Butanoic acid, 4-((1,2-dioxohexadecyl)amino)-, ethyl ester	1.51872	0.0347163	0.663097	0.639904	-0.644074	down
MW0126489	Rutaecarpine	1.34295	0.00080653	0.359208	0.890428	-0.16743	down
MEDL00638	Taurocholic acid	1.96919	0.0192307	0.611776	0.433842	-1.20476	down
MEDN1302	1D-myo-inositol 1,4-bisphosphate	2.18787	0.0230543	0.644028	1.30224	0.380999	up
MW0169945	Triamcinolone diacetate	1.24911	0.0330477	0.663097	0.590828	-0.759189	down
MW0006440	Butoconazole	1.29629	0.0395009	0.688109	0.85026	-0.234023	down
ZINC895703	D-Homocysteine	2.02615	0.00189896	0.503225	0.817719	-0.290323	down
MW0049220	Deoxycorticosterone acetate	2.60524	0.0489419	0.707618	1.64817	0.720866	up
MW0138657	Kaempferol 3-sophoroside-7-glucoside	1.32161	0.00189491	0.503225	0.622238	-0.684463	down
MW0157111	Sodium salicylate	1.535	0.00593192	0.503225	0.815249	-0.294688	down
MW0013984	3beta-Hydroxy-5alpha-pregnan-20-one	1.35059	0.0286808	0.663097	1.2676	0.342102	up
MW0115305	Sorbitol	2.36491	0.0478924	0.707618	1.33907	0.421236	up
MW0052655	Estradiol benzoate	2.00348	0.0209521	0.63974	1.13176	0.178572	up
MW0169677	Pinolenic Acid ethyl ester	2.33636	0.0313673	0.663097	1.53975	0.622697	up
MW0147424	Chlorophyll	1.38416	0.0455841	0.707618	1.28729	0.364342	up
MW0004159	3,4-Dihydroxy-5-methoxybenzoic acid	1.16125	0.0312597	0.663097	1.04098	0.057948	up
MW0103487	Bucladesine	1.14635	0.00387169	0.503225	0.815824	-0.293671	down
MW0056964	1-Stearoyl-2-arachidonoyl-sn-glycero-3-phosphocholine	1.51452	0.0146193	0.575372	1.2222	0.289482	up
MW0154102	Braco-19	1.41008	0.0358001	0.663097	1.09503	0.130972	up
MW0061088	Petromyzonol	1.55877	0.00568592	0.503225	0.965601	-0.0505006	down
MW0000287	Omacetaxine mepesuccinate	1.77011	0.0449577	0.707618	0.724593	-0.464758	down
MW0052450	Docosahexaenoic acid methyl ester	1.39111	0.0491603	0.707618	0.86699	-0.205913	down
MW0146393	Astrocasine	1.62715	0.047515	0.707618	1.11905	0.162275	up
MW0156122	Prostaglandin B2-d4	2.7777	0.0304604	0.663097	1.63868	0.71253	up
MW0002064	2,2',3,4,4',5',6-Heptabromodiphenyl ether	1.60661	0.0491074	0.707618	1.19575	0.257915	up
MW0169525	N-Arachidonoyl-L-Serine	2.53136	0.022352	0.644028	1.90948	0.933177	up
MEDP1096	PC(12:0/12:0)	2.7768	0.0154047	0.575372	1.38061	0.465305	up
MW0000104	7-Ethyl-10-(4-N-aminopentanoic acid)-1-piperidino)carbonyloxycamptothecin	2.51763	0.0133896	0.575372	1.4322	0.518229	up
MW0150746	Hemine	1.73085	0.011359	0.565728	0.706184	-0.501884	down
MW0063393	S-1 Methanandamide	1.22113	0.015561	0.575372	0.919296	-0.121399	down
MW0063299	R-2 Methanandamide	1.28504	0.0210075	0.63974	0.929082	-0.106122	down
MW0169724	Pymetrozine	1.1488	0.0200215	0.622845	0.629819	-0.666991	down
MEDP1045	Biliverdin	2.20587	0.0114973	0.565728	1.27626	0.351922	up
MEDL01000	Octopamine	1.98501	0.00736159	0.504571	0.691787	-0.5316	down
MW0000302	Irinotecan	2.24987	0.0063622	0.503745	1.28376	0.360374	up
FDATN01470	DL-Citrulline	1.89195	0.000743169	0.359208	0.755147	-0.40517	down
MEDP1417	Carnitine C10:1-OH	2.40724	0.0348553	0.663097	1.38166	0.466402	up
MEDP1321	LPC(0:0/22:5)	2.81278	0.0267195	0.64763	1.30852	0.387933	up
MW0107825	Leukotriene D4 methyl ester	1.64907	0.00750555	0.504571	0.63223	-0.661479	down
MW0158670	Tyr-Val-Lys-Ala-Leu	1.72792	0.0286038	0.663097	0.664385	-0.589908	down
MW0158396	Tyr-Asn-His-Arg	2.3451	0.0260492	0.644028	1.89691	0.923655	up
MW0011927	1,2-Distearoyl-sn-glycero-3-phosphocholine	1.78658	0.0192268	0.611776	1.61568	0.692144	up
MW0150979	His-Ile-Phe-Glu	2.85504	0.0107999	0.549715	1.61679	0.693134	up
MW0105669	Arg-Phe-Arg	1.71385	0.0471613	0.707618	1.24501	0.316154	up
MW0158567	Tyr-Phe-Glu-Lys	2.44596	0.00933106	0.528962	1.48887	0.57422	up
MW0057646	1-Stearoyl-2-docosahexanoyl-sn-glycero-3-phosphocholine	1.29885	0.0125823	0.575372	1.27252	0.34769	up
MW0108425	ethyl (E,4S)-4-[[3-hydroxy-2-[[(2S)-2-[(3-hydroxy-2-methylbenzoyl)amino]-3-methylbutanoyl]amino]propanoyl]amino]-6-methylhept-2-enoate	3.06805	0.0140837	0.575372	2.58278	1.36892	up
MW0149735	Gln-Leu-Asn-Leu-Lys	1.3745	0.0355693	0.663097	0.826941	-0.274144	down
MW0105634	Antanapeptin C	2.0052	0.0365744	0.664871	1.26582	0.340069	up
MW0006552	Chloroxylenol	2.23366	0.00677267	0.504571	0.816586	-0.292323	down
MW0146523	Bacteriohopanetetrol-acetylglucosamine	1.53824	0.0344748	0.663097	1.29998	0.37849	up
MW0054007	Ichangin 4-glucoside	2.4355	0.0131829	0.575372	1.42759	0.513584	up
MW0129639	1,26-Dicaffeoylhexacosanediol	1.46818	0.0335303	0.663097	1.17873	0.237229	up
MW0131312	3-(4-hydroxy-3,5-dimethoxyphenyl)-1-(2,4,6-trihydroxy-3-methoxyphenyl)propane-1,2-dione	1.15932	0.0222666	0.644028	0.672713	-0.571937	down
MW0149042	C35H36F3N3O5	2.57476	0.010352	0.549715	1.45266	0.538699	up
MW0012793	1-Eicosanoyl-glycero-3-phosphate	1.23559	0.0499352	0.707618	0.701295	-0.511907	down
MW0155973	Pro-Pro-Asp-Gln-Gln	2.40748	0.00368987	0.503225	1.29737	0.375594	up
MW0153545	Met-Glu-Leu-Ser-Glu	2.22224	0.0161485	0.575372	1.28661	0.363575	up
MW0155831	Pro-Gln-Gln-Asp-Glu	1.89674	0.0338033	0.663097	1.30293	0.381762	up
MW0158404	Tyr-Asn-Val-Lys	2.32553	0.0453753	0.707618	1.53518	0.61841	up
MW0153158	Lys-Thr-Phe-Glu	2.06505	0.0474509	0.707618	1.44741	0.533476	up
MW0146116	Asp-Gly-Lys-Ile-Leu	1.88961	0.0270015	0.650044	1.2491	0.320884	up
MW0157759	Thr-Phe-Glu-Glu-Asp	2.62617	0.00828707	0.528962	1.47006	0.555875	up
MW0151444	Ile-His-Ala-Glu	1.97242	0.00137252	0.503225	0.660541	-0.59828	down
MW0145271	Arg-Asn-Gln-Glu	2.72728	0.0413143	0.697644	1.59082	0.669773	up
MW0159233	Val-Val-Asn-Trp-Asp	2.45904	0.00490266	0.503225	0.536236	-0.89906	down
MW0155937	Pro-Lys-Val-Lys-Ala	2.03179	0.0445946	0.707618	1.33702	0.419022	up
MW0151465	Ile-Ile-Arg-Ser-Ser	1.56379	0.0105743	0.549715	1.1839	0.243543	up
MW0146103	Asp-Glu-Leu-Asn-Gln	2.48239	0.0139416	0.575372	1.43804	0.524104	up
MW0145833	Asn-Lys-Leu-Arg	2.25166	0.0309031	0.663097	1.19504	0.257054	up
MW0149380	Gal1-3[Fuc1-4]GlcNAcSp	2.59093	0.00935297	0.528962	1.45816	0.54415	up
MW0113191	5,9:6,9-Diepoxy-3-megastigmene	2.11496	0.0396729	0.688109	1.18182	0.241004	up
MW0145876	Asn-Pro-Lys-Ala-Met	2.03896	0.0266635	0.64763	1.37318	0.457522	up
MW0152207	Leu-Ala-Pro-Lys-Ile	2.111	0.0314979	0.663097	1.19179	0.253128	up
MW0149383	Gal1-3Gal1-4GlcNAcSp	2.04302	0.0236236	0.644028	1.38268	0.467464	up
MW0151629	Ile-Tyr-Lys-Ile-Arg	1.21563	0.0401985	0.688109	1.20755	0.272085	up
MW0149381	Gal1-3Gal1-3GlcNAcSp	2.57961	0.013289	0.575372	1.5156	0.599884	up
MW0148886	Elloramycin	2.33342	0.00732132	0.504571	1.33316	0.414852	up
MEDN0745	Propylparaben	1.32506	0.0335436	0.663097	0.837378	-0.256048	down
MW0114332	D-Myo-inositol-2,4,5-triphosphate	1.1653	0.0160661	0.575372	1.0931	0.12843	up
MW0109886	Thr-Met	1.37081	0.00409975	0.503225	0.511523	-0.967129	down
MW0000764	AS-252424	1.73868	0.00986065	0.548961	0.571872	-0.806237	down
MW0009714	Salmeterol	2.17868	0.0155938	0.575372	1.29575	0.373789	up
MW0014656	Sapintoxin d	2.0823	0.00147632	0.503225	1.22593	0.293876	up
MW0011556	(ent-2b,4S,9a)-2,4,9-Trihydroxy-10(14)-oplopen-3-one 2-(2-methylbutanoate) 9-(3-methyl-2E-pentenoate)	1.38611	0.00635807	0.503745	0.4889	-1.03239	down
MW0138813	Loxoprofen	2.28851	0.0178333	0.605142	1.51879	0.602921	up
MW0054376	Linoleic Acid-d4	1.47609	0.0215583	0.644028	1.16433	0.219506	up
MW0105234	4-Hydroxyisoleucine	2.17212	0.0352756	0.663097	0.937827	-0.0926061	down
MW0148180	Debromohymenialdisine	2.0963	0.00418842	0.503225	0.890233	-0.167746	down
MEDP0129	Phenethylamine	1.9927	0.0117496	0.565728	0.954013	-0.0679197	down
MW0000339	Morphine N-oxide	1.86654	0.0252731	0.644028	1.31896	0.399405	up
MW0123105	Bilirubin	2.07041	0.0471546	0.707618	1.23276	0.301889	up
MW0110970	Cyclophosphamide	1.65743	0.00819925	0.528962	0.76492	-0.386619	down
MEDN0383	FFA(18:2)	2.20886	0.0249654	0.644028	1.16257	0.217318	up
MW0169291	Idebenone	1.70034	0.0190702	0.611776	0.48644	-1.03967	down
MW0115141	Physostigmine	1.32933	0.00737512	0.504571	0.908907	-0.137795	down
MW0125214	Moreollin	2.38637	0.00176899	0.503225	0.861472	-0.215124	down
MEDL02147	Sinapyl alcohol	1.42958	0.00575163	0.503225	0.479543	-1.06027	down
MW0133189	3-O-Acetylpinobanksin	1.92361	0.0333463	0.663097	0.749046	-0.416874	down
MW0063751	Taurolithocholic acid	2.77341	0.0117446	0.565728	2.36599	1.24244	up
MW0149329	Fusicoccin H	2.80698	0.00916277	0.528962	2.48175	1.31136	up
MW0131340	Naringenin chalcone	1.88802	0.00034487	0.312717	0.646275	-0.629779	down
MW0146491	Azafrin	2.61513	0.00421245	0.503225	0.918474	-0.122688	down
MW0133248	Hydrocinnamic acid	2.98903	4.01916e-05	0.143203	0.300315	-1.73545	down
MW0141178	1,5-Anhydro-d-mannitol	1.49475	0.0041736	0.503225	0.687842	-0.53985	down
MW0168967	Colchiceine	1.29034	0.0462926	0.707618	0.681485	-0.553246	down
MW0053757	Glycolithocholic acid	1.05909	0.00526897	0.503225	0.919429	-0.12119	down
MW0143852	6-Iminocyclohexa-2,4-dienone	2.15802	0.0262094	0.644028	1.77023	0.823933	up
MW0145084	Androstane-3,17-diol dipropionate	1.74667	0.0089407	0.528962	0.694041	-0.526907	down
MW0010102	2-Cyclohexyl-2-hydroxy-2-phenylacetic acid	1.83259	0.0299464	0.663097	1.29713	0.375327	up
MEDN0766	11-deoxy PGE1	1.5603	0.0350174	0.663097	0.719918	-0.474096	down
MW0154982	Penitrem C	3.68756	0.0152701	0.575372	0.623355	-0.681874	down
MW0006384	Bisisodiospyrin	2.05377	0.00480112	0.503225	1.23122	0.300087	up
MW0147046	Unii-72U0C7paav	2.22369	0.0488738	0.707618	1.33926	0.421435	up
MW0006473	Capillene	1.62126	0.00713762	0.504571	0.753269	-0.408762	down
MW0154056	N-(2-Phenylethyl)indomethacin Amide	2.34103	0.0152446	0.575372	1.35353	0.436725	up
MEDN1751	2-Hexyldecanoic acid	1.95013	0.00043884	0.312717	0.875891	-0.191176	down
MEDN1079	FFA(22:6)	1.88168	0.0289197	0.663097	1.35469	0.437961	up
MW0015788	Androsterone sulfate	1.14024	0.0261593	0.644028	0.665348	-0.587819	down
MW0103316	N2,N2-Dimethylguanosine	2.52547	0.0320433	0.663097	1.26981	0.344609	up
MW0123116	Biotin-XX-Hydrazide	3.08302	0.00585541	0.503225	2.31267	1.20956	up
MW0063689	Strictosidine	2.57734	0.00261592	0.503225	1.47594	0.561638	up
MW0054695	5,8,11-Eicosatrienoic acid	2.32737	0.0212909	0.642878	1.30095	0.379568	up
MW0125230	Mukonal	1.84771	0.0231272	0.644028	0.430814	-1.21486	down
MW0000341	Morphine-6-glucuronide	2.42532	0.0420587	0.700257	1.40401	0.489553	up
MW0054816	Methyl 15-cyanopentadecanoate	2.20941	0.0250627	0.644028	1.16061	0.214878	up
MW0154157	3-Hydroxy-N-[(3S)-tetrahydro-2-oxo-3-furanyl]-octanamide	2.69443	0.0251054	0.644028	0.947274	-0.0781467	down
MW0137417	Artocarpetin B	1.42232	0.0220351	0.644028	0.692468	-0.530182	down
MW0125991	Ornidazole	1.57869	0.00551442	0.503225	0.661534	-0.596112	down
MW0013494	Sulfoglycolithocholic acid	2.58704	0.0155276	0.575372	0.551538	-0.858469	down
MW0052889	Fasciculic acid C	2.6713	0.000312674	0.312717	0.8044	-0.314014	down
MW0055136	Mupirocin	2.66365	0.0228381	0.644028	1.52954	0.6131	up
MW0128408	(Z)-7-Hexadecen-1,16-olide	2.43729	0.0401025	0.688109	1.47003	0.55585	up
MEDN0730	4-Ethylphenol	1.32239	0.0138034	0.575372	0.509464	-0.972949	down
MW0016371	Capsianoside V	2.2414	0.0307195	0.663097	1.53736	0.620455	up
MW0054355	Limonin	2.65756	0.0339335	0.663097	1.52694	0.610645	up
MW0000447	Somniferine	1.91829	0.0381137	0.680844	1.18279	0.242193	up
MW0124312	Hexyl heptanoate	2.5959	0.0105374	0.549715	1.38177	0.466519	up
MW0153811	Methyl farnesoate	2.58599	0.0447732	0.707618	1.3749	0.459329	up
MW0147769	Copalliferol B	2.6874	0.00587326	0.503225	1.45344	0.539474	up
MEDN0381	FFA(16:0)	1.79985	0.0426081	0.702837	1.07458	0.103769	up
MW0001653	1-Naphthylamine	1.48076	0.0259463	0.644028	0.335326	-1.57636	down
MW0010683	bicyclo-PGE2	1.09939	0.0319956	0.663097	0.406644	-1.29816	down
MW0062166	Pregnenolone sulfate	1.43245	0.0385996	0.680844	0.676993	-0.562787	down
MW0126100	PI-103	1.83299	0.0492532	0.707618	1.30818	0.387559	up
MW0052513	Eicosapentaenoic Acid-d5	2.30242	0.0181874	0.605623	1.31695	0.397197	up
MW0162001	Histidyltryptophyldiketopiperazine	2.02103	0.0239256	0.644028	0.868005	-0.204225	down
MW0014404	4alpha-Formyl-4beta-methyl-5alpha-cholesta-8,24-dien-3beta-ol	1.77764	0.0107321	0.549715	0.739843	-0.434709	down
MW0141699	1-Caffeoyl-beta-D-glucose	1.32817	0.0467092	0.707618	0.49314	-1.01993	down
MW0147427	Chlorophyllide b	2.37832	0.00399884	0.503225	1.26681	0.341198	up
MW0006068	ANTIMYCIN A(A1 shown)	1.0314	0.00278045	0.503225	0.803666	-0.315332	down
MW0154597	Norbormide	2.28201	0.0139118	0.575372	1.38996	0.475048	up
MW0142797	3,7-Dihydroxycoprostanic acid	1.08204	0.00538278	0.503225	0.921087	-0.118591	down
MW0012382	Isopalmitic acid	1.42707	0.000632004	0.359208	0.644134	-0.634568	down
MW0126665	3-Oxazolidinecarboxylic acid, 2,2-dimethyl-4-(1-oxo-2-hexadecyn-1-yl)-, 1,1-dimethylethyl ester, (4S)-	1.04606	0.0062728	0.503745	0.920437	-0.119609	down
MW0144016	8,12-Diethyl-3-vinylbacteriochlorophyllide d	1.79693	0.0276243	0.657508	1.30842	0.387831	up
MW0138049	ent-Epiafzelechin(2a->7,4a->8)epiafzelechin 3-(4-hydroxybenzoic acid)	1.91126	0.0408803	0.693602	1.18375	0.243368	up
MW0158495	Tyr-Ile-Arg-Asp	2.6727	0.0235463	0.644028	1.87124	0.903994	up
MW0002432	CP 47,497-C8-homolog C-8-hydroxy metabolite	1.76894	0.0385565	0.680844	1.27549	0.351057	up
MW0114966	N-Acetylmuramoyl-Ala	1.81236	0.00716663	0.504571	0.55065	-0.860793	down
MW0015132	7',8'-Dihydro-8'-hydroxyreticulataxanthin	1.04305	0.0349739	0.663097	0.889014	-0.169721	down
MW0193970	Bisphenol C	1.01078	0.0241692	0.644028	0.803131	-0.316293	down
MW0103943	(5-Ethenyl-2-hydroxyphenyl) hydrogen sulate	1.72156	0.0309973	0.663097	2.69257	1.42898	up
MW0155059	Phaeophorbide b	1.99948	0.0352011	0.663097	1.21192	0.277292	up
MW0150193	Glu-Tyr-Ile-Glu	1.72557	0.0445137	0.707618	1.38154	0.466273	up
MW0126510	Sapanisertib	2.60354	0.0091738	0.528962	1.38803	0.473039	up
MW0057053	PC(18:2(9Z,12Z)/18:1(11Z))	2.09881	0.0255877	0.644028	0.84104	-0.249754	down
MW0057050	1-[(9Z,12Z)-octadecadienoyl]-2-hexadecanoyl-sn-glycero-3-phosphocholine	2.17459	0.0425001	0.702837	0.805969	-0.311204	down
MW0107192	Glyphosine	1.43665	0.0346899	0.663097	0.783133	-0.35267	down
MW0138958	3-Hydroxy-alpha-methyl-DL-tyrosine	1.86054	0.035591	0.663097	1.2325	0.301586	up
MW0151722	[(2S,3S,5R,6R)-2,3,5,6-tetrahydroxy-4-[(2S,3R,4S,5S)-3,4,5-trihydroxytetrahydropyran-2-yl]oxy-cyclohexyl] 2-(1H-indol-3-yl)acetate	2.06504	0.0340129	0.663097	0.8888	-0.17007	down
MW0158621	Tyr-Thr-Gln-Arg	2.18334	0.043723	0.707618	1.32491	0.405893	up
MW0160044	4-Nitrophenyl butyrate	1.57868	0.00486848	0.503225	0.822364	-0.28215	down
MW0134543	5-hydroxy-6-[(E)-2-methoxyethenyl]-7-methyl-2H-chromen-2-one	2.04594	0.00255974	0.503225	0.487312	-1.03708	down
MW0012966	1-Palmitoyl-2-linoleoyl-sn-glycero-3-phosphate	1.87382	0.00287557	0.503225	0.822032	-0.282734	down
MW0057497	1,2-Dierucoyl-sn-glycero-3-phosphocholine	2.45685	0.0004177	0.312717	0.773799	-0.36997	down
MW0143205	methyl {2-[(1R)-1-(3,4-dimethoxyphenyl)-4-oxocyclohex-2-en-1-yl]ethyl}methylcarbamate	1.81542	0.0159157	0.575372	1.16781	0.2238	up
MW0053951	[(2S,3R)-3-[(1S,2R,4aR,4bR,7S,8aR,10aR)-7-hydroxy-4b,8,8,10a-tetramethyl-2'-oxospiro[2,3,4,4a,5,6,7,8a,9,10-decahydrophenanthrene-1,4'-oxolane]-2-yl]-1-[(2R)-4-methyl-5-oxooxolan-2-yl]butan-2-yl] acetate	1.41185	0.0201031	0.622845	0.878901	-0.186227	down
MW0055331	N-Nitrosotomatidine	1.34102	0.0187301	0.611776	0.825779	-0.276173	down
MW0161302	N-Cinnamoyl Serotonin	2.04351	0.0171745	0.594105	1.30268	0.381481	up
MW0138036	Egonol gentiobioside	2.01462	0.0143114	0.575372	1.23065	0.299424	up
MW0006055	2-p-Methoxyphenylmethyl-3-acetoxy-4-hydroxypyrrolidine	2.95053	0.0105949	0.549715	0.925928	-0.111028	down
MW0143481	5-(3-Hydroxy-4-acetoxybut-1-ynyl)-2,2'-bithiophene	1.13556	0.0352852	0.663097	0.886964	-0.173053	down
MW0056900	1-Hexadecanoyl-2-docosanoyl-sn-glycero-3-phosphocholine	1.29163	0.0382245	0.680844	1.23503	0.304547	up
MW0114446	Etridiazole	1.84264	0.0478678	0.707618	1.46639	0.552272	up
MW0142966	3-hydroxyandrost-5-en-17-one sulfate	2.09678	0.0244764	0.644028	0.671089	-0.575423	down
MW0141675	19-hydroxy-17-oxoandrost-5-en-3-yl sulfate	1.99223	0.0237241	0.644028	0.679522	-0.557408	down
MW0157621	Thr-Glu-Arg-Glu	1.01373	0.0044305	0.503225	0.817084	-0.291444	down
MW0152289	Leu-Gln-Glu-Lys	3.04508	0.0345363	0.663097	3.18048	1.66925	up
MW0145518	Arg-Thr-Ile-Glu	1.78572	0.0326169	0.663097	1.94805	0.962028	up
MW0141280	11b-Prostaglandin F2a-d4	1.25053	0.0319158	0.663097	0.83656	-0.25746	down
MW0053901	Medica 16	1.43263	0.0223127	0.644028	0.747674	-0.419519	down
MW0154290	Nap-Nap-OH	1.61507	0.00433078	0.503225	0.599326	-0.738587	down
MW0158703	TyrMe-HoPhe-OH	1.57361	0.0181593	0.605623	0.708533	-0.497094	down
MW0144778	Ala-Tyr-Ile-Asp	3.00186	0.00461375	0.503225	0.717249	-0.479453	down
MW0155169	Phe-Gln-Thr-Lys	2.6575	0.014996	0.575372	1.55759	0.639319	up
MW0159193	Val-Thr-Tyr-Lys	2.37559	0.048755	0.707618	0.917835	-0.123694	down
MW0145499	Arg-Ser-Lys-Arg	1.45216	0.0119951	0.569847	0.89615	-0.158188	down
MW0013529	AS 1-5	1.06095	0.046873	0.707618	0.701392	-0.511707	down
MW0149388	Gal1-4[Fuc1-3]GlcNAcSp	1.85966	0.0321978	0.663097	1.24406	0.315055	up
MW0152326	Leu-Glu-Phe-Glu	2.25202	0.0251732	0.644028	1.35186	0.434942	up
MW0167095	(2Z,4E)-5-(3,8-dihydroxy-1,5-dimethyl-6-oxabicyclo[3.2.1]octan-8-yl)-3-methylpenta-2,4-dienoic acid	2.60265	0.026007	0.644028	1.98004	0.985527	up
MW0156688	Ser-Asp-Thr-Glu	2.41144	0.0340621	0.663097	0.728804	-0.456398	down
MW0144642	Ala-Leu-Phe-Glu	2.09526	0.00900657	0.528962	1.21088	0.276054	up
MW0152870	Lys-Arg-Leu-Glu	1.59361	0.0128223	0.575372	0.724083	-0.465772	down
MW0149389	Gal1-4Gal1-4GlcNacSp	2.16568	0.00700998	0.504571	1.31321	0.393097	up
MW0010444	(+)-Lyoniresinol 9-glucoside	2.12281	0.00342702	0.503225	1.28596	0.362848	up
MW0156192	PtdIns-(1,2-dioctanoyl)(sodium salt)	1.06499	0.019903	0.622845	0.730728	-0.452593	down
